# Supplementary material for: Pre-Pregnancy Diet Quality Is Associated with Lowering the Risk of Offspring Obesity and Underweight: Finding from a Prospective Cohort Study
Source: Nutrients. 2021 Mar 24;13(4):1044. doi: 10.3390/nu13041044 (PMC8063840; doi:10.3390/nu13041044)
Supplement: Supplementary file 1 [file nutrients-13-01044-s001.pdf]

**Pre-pregnancy diet quality is associated with lowering risk of offspring obesity and underweight: finding from prospective cohort study**

Dereje G. Gete

Online Supplementary Materials

**Supplementary Table 1.** Multinomial logistic regression model of offspring BMI categories with HEI-2015 score and pre-pregnancy BMI, with stratified interaction model

| Offspring BMI categories | Pre-pregnancy BMI                      | HEI-2015 score | Unadjusted RRR (95% CI) | Adjusted RRR (95% CI) <sup>a</sup> |
|--------------------------|----------------------------------------|----------------|-------------------------|------------------------------------|
| Underweight              | Healthy weight, < 25 kg/m <sup>2</sup> | Quartile 1     | 1.00                    | 1.00                               |
|                          |                                        | Quartile 2     | 0.84 (0.58, 1.21)       | 0.89 (0.61, 1.30)                  |
|                          |                                        | Quartile 3     | 0.71 (0.49, 1.02)       | 0.84 (0.57, 1.23)                  |
|                          |                                        | Quartile 4     | 0.73 (0.50, 1.05)       | 0.79 (0.54, 1.15)                  |
|                          | Overweight, 25 - <30 kg/m <sup>2</sup> | Quartile 1     | 1.00                    | 1.00                               |
|                          |                                        | Quartile 2     | 1.04 (0.48, 2.21)       | 1.06 (0.47, 2.39)                  |
|                          |                                        | Quartile 3     | 0.74 (0.32, 1.72)       | 0.68 (0.28, 1.65)                  |
|                          |                                        | Quartile 4     | 0.56 (0.24, 1.34)       | 0.56 (0.22, 1.41)                  |
|                          | Obese, ≥30 kg/m <sup>2</sup>           | Quartile 1     | 1.00                    | 1.00                               |
|                          |                                        | Quartile 2     | 1.46 (0.48, 4.40)       | 1.52 (0.49, 4.68)                  |
|                          |                                        | Quartile 3     | 0.80 (0.20, 3.09)       | 0.76 (0.19, 2.98)                  |
|                          |                                        | Quartile 4     | 0.33 (0.06, 1.74)       | 0.35 (0.06, 1.87)                  |
|                          | p-values for interaction               |                | 0.48                    | 0.46                               |
| Overweight               | Healthy weight, < 25 kg/m <sup>2</sup> | Quartile 1     | 1.00                    | 1.00                               |
|                          |                                        | Quartile 2     | 1.25 (0.82, 1.89)       | 1.42 (0.91, 2.20)                  |
|                          |                                        | Quartile 3     | 1.08 (0.70, 1.66)       | 1.18 (0.75, 1.85)                  |
|                          |                                        | Quartile 4     | 1.21 (0.80, 1.84)       | 1.29 (0.82, 2.03)                  |
|                          | Overweight, 25 - <30 kg/m <sup>2</sup> | Quartile 1     | 1.00                    | 1.00                               |
|                          |                                        | Quartile 2     | 0.70 (0.33, 1.46)       | 0.65 (0.30, 1.43)                  |
|                          |                                        | Quartile 3     | 0.91 (0.44, 1.91)       | 0.91 (0.41, 1.98)                  |
|                          |                                        | Quartile 4     | 0.55 (0.26, 1.18)       | 0.49 (0.22, 1.11)                  |
|                          | Obese, ≥30 kg/m <sup>2</sup>           | Quartile 1     | 1.00                    | 1.00                               |
|                          |                                        | Quartile 2     | 0.75 (0.31, 1.78)       | 0.67 (0.27, 1.66)                  |
|                          |                                        | Quartile 3     | 0.78 (0.34, 1.82)       | 0.63 (0.24, 1.65)                  |
|                          |                                        | Quartile 4     | 0.56 (0.22, 1.43)       | 0.65 (0.25, 1.69)                  |

|       |                                           |            |                    |                   |
|-------|-------------------------------------------|------------|--------------------|-------------------|
|       | p-values for interaction                  |            | 0.71               | 0.58              |
| Obese | Healthy weight,<br>< 25 kg/m <sup>2</sup> | Quartile 1 | 1.00               | 1.00              |
|       |                                           | Quartile 2 | 0.42 (0.16, 1.09)  | 0.65 (0.24, 1.77) |
|       |                                           | Quartile 3 | 0.80 (0.37, 1.74)  | 1.33 (0.57, 3.10) |
|       |                                           | Quartile 4 | 0.51 (0.20, 1.31)  | 0.74 (0.28, 1.96) |
|       | Overweight,<br>25 - <30 kg/m <sup>2</sup> | Quartile 1 | 1.00               | 1.00              |
|       |                                           | Quartile 2 | 2.35 (0.51, 10.85) | 1.76 (0.40, 7.69) |
|       |                                           | Quartile 3 | 0.98 (0.24, 4.03)  | 0.75 (0.19, 2.88) |
|       |                                           | Quartile 4 | 1.27 (0.25, 6.45)  | 0.99 (0.19, 5.05) |
|       | Obese,<br>≥30 kg/m <sup>2</sup>           | Quartile 1 | 1.00               | 1.00              |
|       |                                           | Quartile 2 | 2.39 (0.64, 8.84)  | 1.85 (0.46, 7.49) |
|       |                                           | Quartile 3 | 0.99 (0.28, 3.47)  | 0.70 (0.19, 2.60) |
|       |                                           | Quartile 4 | 0.29 (0.05, 1.77)  | 0.14 (0.01, 1.42) |
|       | p-values for interaction                  |            | 0.47               | 0.51              |

<sup>a</sup> Adjusted for maternal education, smoking status, physical activity, household income, child diets, sex, age, and breast feeding status. In both models, women with a lowest quartile of HEI-2015 score and children with normal weight are used as reference groups.

**Supplementary table 2.** Stability and changes in HEI-2015 scores from before pregnancy to during pregnancy (n= 310) <sup>a</sup>

| Dietary patterns | Period           | Mean (SD)   | Spearman's correlation coefficient (r) |
|------------------|------------------|-------------|----------------------------------------|
| HEI-2015 score   | Before pregnancy | 58.4 (12.1) | 0.38                                   |
|                  | During pregnancy | 59.7 (10.9) |                                        |
|                  | Mean difference  | 1.3 (12.7)  |                                        |
|                  | <i>P-value</i>   | 0.07        | < 0.0001                               |

<sup>a</sup> Values are mean (SD) and correlation coefficients (r), p-values from and paired t-test and Spearman's correlation
